# Supplementary material for: Solid-state reactivity of copper(i) iodide: luminescent 2D-coordination polymers of CuI with saturated bidentate nitrogen bases
Source: Royal Society of Chemistry journal article supplement (doi:10.1039/c0nj00547a), 2010-11-22
Supplement: c0nj00547a.pdf [file c0nj00547a.pdf]

# **Solid-state reactivity of copper(I) iodide: luminescent 2D-coordination polymers of CuI with saturated bidentate nitrogen bases**

**Dario Braga,<sup>a</sup> Fabrizia Grepioni,<sup>a</sup> Lucia Maini,<sup>a</sup> Paolo P. Mazzeo<sup>a</sup> and Barbara Venturi<sup>b</sup>**

<sup>a</sup> *Dipartimento di Chimica "G. Ciamician", Università degli studi di Bologna, Via Selmi 2, 40126 Bologna, Italy.*

<sup>b</sup> *Istituto per la Sintesi Organica e la Fotoreattività (ISOF) – CNR, Via Gobetti 101, 40129 Bologna (Italy)*

## **Electronic Supplementary Information**

4 pages

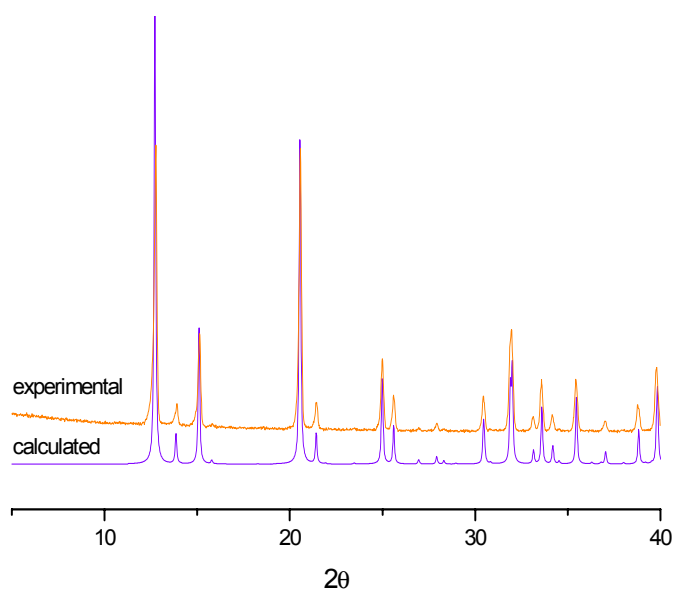

**Fig. ESI 1:** Comparison between calculated and experimental X-ray powder diffractograms of **1**

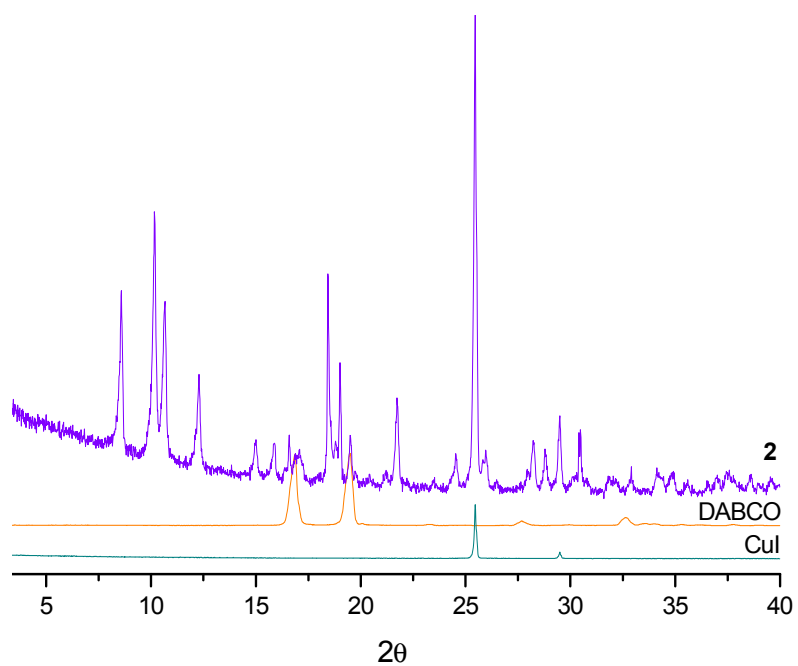

**Fig. ESI 2:** Comparison of diffractograms for starting reagents and **2**

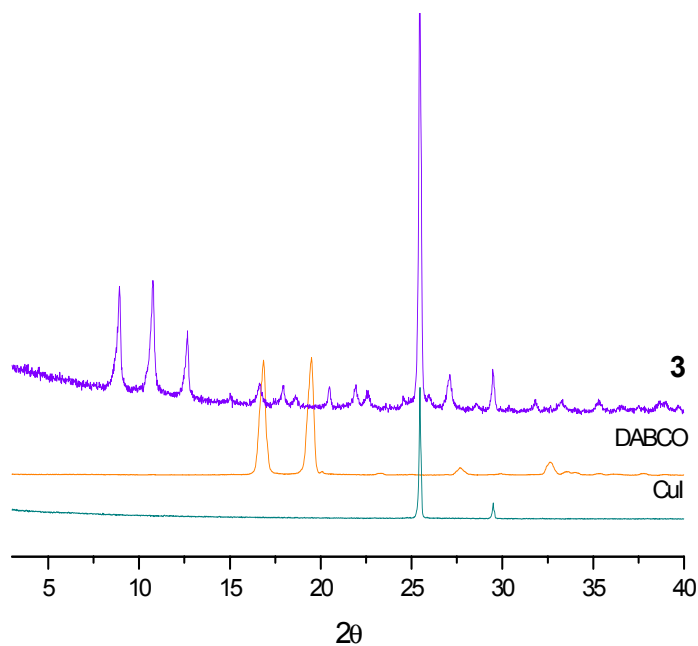

**Fig. ESI 3:** Comparison of diffractograms for the starting reagents and **3**

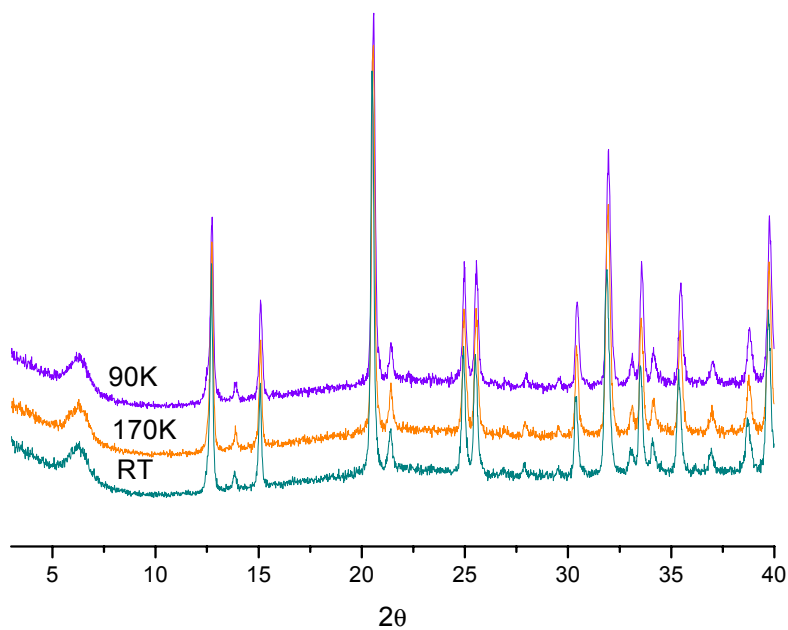

**Fig. ESI 4:** Variable temperature X-ray diffractograms of compound **1**: no transition phase is observed.

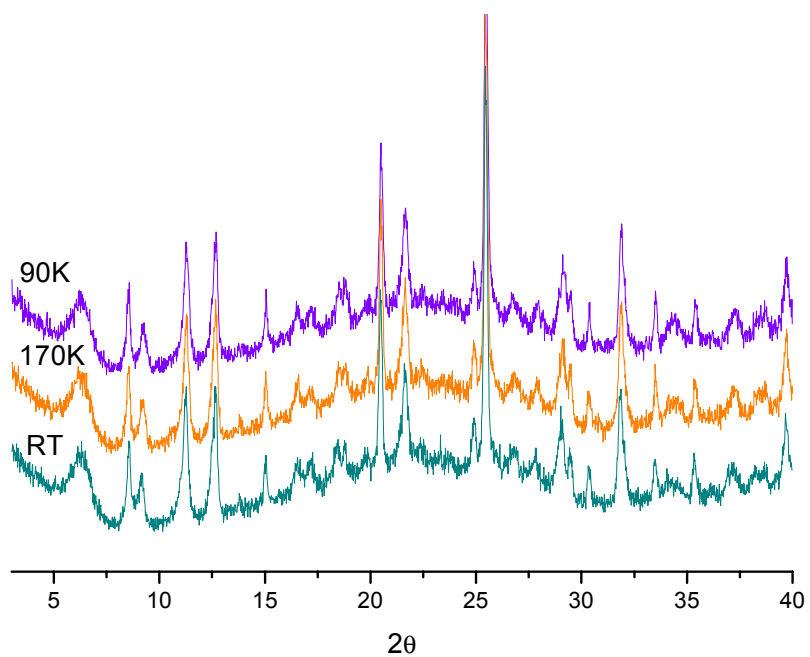

**Fig. ESI 5:** Variable temperature X-ray diffractograms of compound **4**: no transition phase is observed.

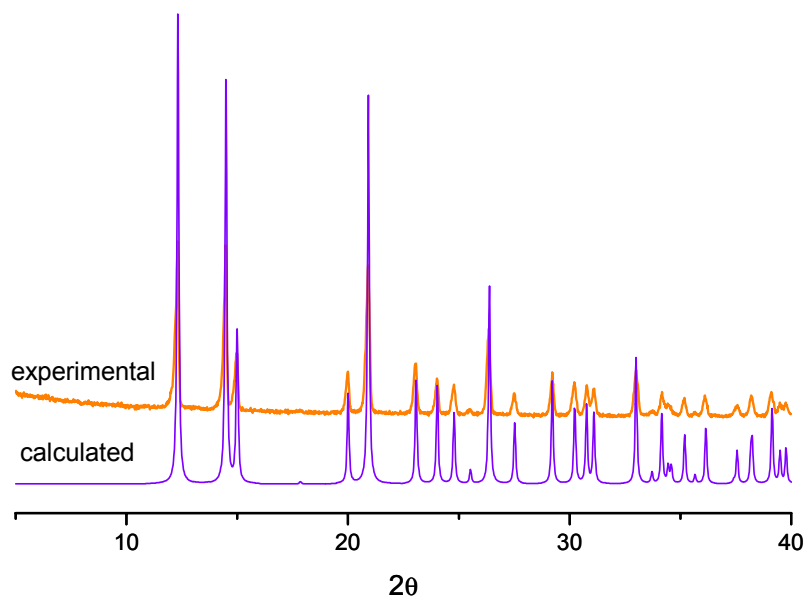

**Fig. ESI 6:** Comparison between calculated and experimental X-ray powder diffractograms of **6**

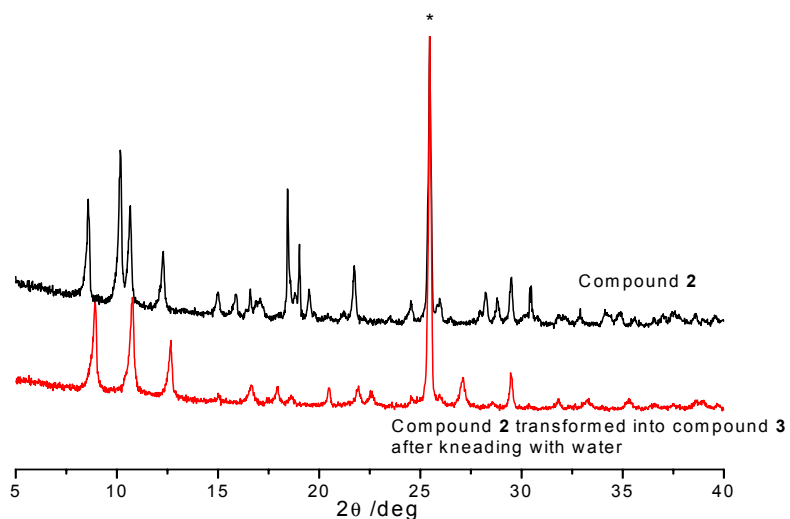

**Fig. ESI 7:** Comparison between the diffractograms of starting compound **2** before and after kneading with water. The starred peak indicates the presence of unreacted CuI.

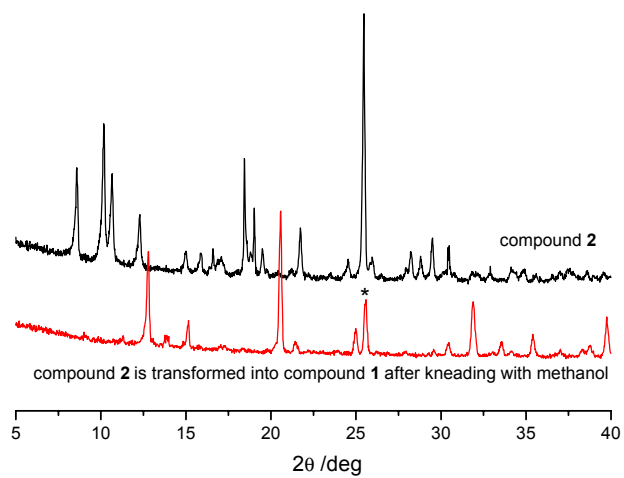

**Fig. ESI 8:** Comparison between the diffractograms of starting compound **2** before and after kneading with methanol. The starred peak indicates the presence of unreacted CuI.

**Table ESI 1** Cell parameters of compound **4** at RT, 150K and 90K

|                     | <b>4 (RT)</b> | <b>4 (150K)</b> | <b>4 (90K)</b> |
|---------------------|---------------|-----------------|----------------|
| Temperature (K)     | 293(2)        | 150(2)          | 90(2)          |
| System              | Monoclinic    | Monoclinic      | Monoclinic     |
| Space group         | <i>C2/m</i>   | <i>C2/m</i>     | <i>C2/m</i>    |
| a (Å)               | 10.315(2)     | 10.1972(7)      | 10.156(7)      |
| b (Å)               | 12.2170(1)    | 12.1811(6)      | 12.134(4)      |
| c (Å)               | 6.859(1)      | 6.7879(5)       | 6.782(4)       |
| $\beta$ (°)         | 120.690(2)    | 120.25(1)       | 120.32(8)      |
| V (Å <sup>3</sup> ) | 743.3(2)      | 728.34(8)       | 721.4(4)       |
